# Supplementary material for: Multiomic profiling reveals metabolic alterations mediating aberrant platelet activity and inflammation in myeloproliferative neoplasms
Source: JCI journal article supplement (doi:10.1172/jci172256), 2023-12-07
Supplement: sd1 [file 1]

Supplementary Figures

Figure S1

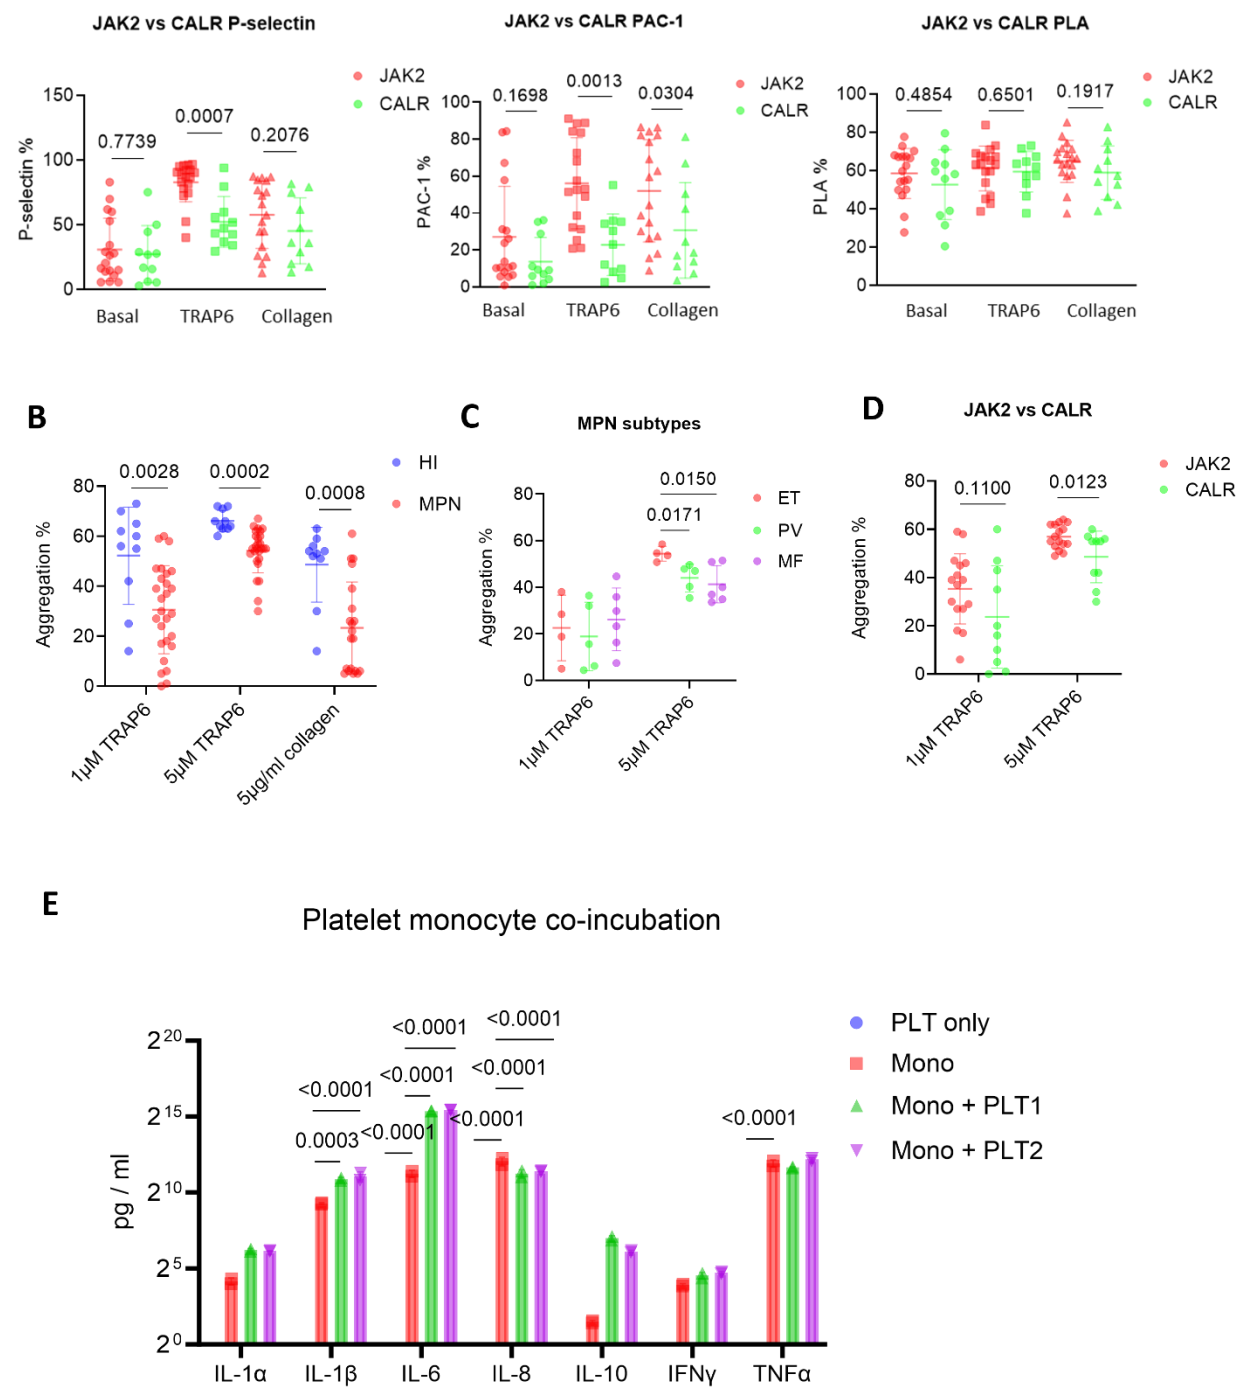

**Figure S1. Analysis of platelet activation, secretion and aggregation.**

A) Dot plot comparing P-selectin,  $\alpha$ IIb $\beta$ 3 integrin expression and PLA formation of platelets from peripheral blood of ET patients with *JAK2* and *CALR* mutations by flow cytometry. Statistics were assessed by two-tailed Mann-Whitney U test.

B) Dot plot showing maximal aggregation intensity of washed platelets from HI (n = 10) and MPN (n = 27). Data is shown as mean  $\pm$  SD. Statistics were assessed by two-tailed Student's t test.

C) Dot plot showing maximal aggregation intensity of washed platelets from subjects with different MPN subtypes. Statistics were assessed by two-tailed Student's t test.

D) Dot plot showing maximal aggregation intensity of washed platelets from MPN patients with *JAK2* or *CALR* mutations. Statistics were assessed by two-tailed Student's t test.

E) Bar plot showing cytokine levels in supernatants. Enriched monocytes (0.5M) with or without the incubation of washed platelets (50M) for 6 hours. Supernatants were collected for cytokine determination by multiplex Luminex assay. Statistics were assessed by two-way ANOVA, comparing mean values against the monocytes group. The platelet group are zeros.

Figure S2

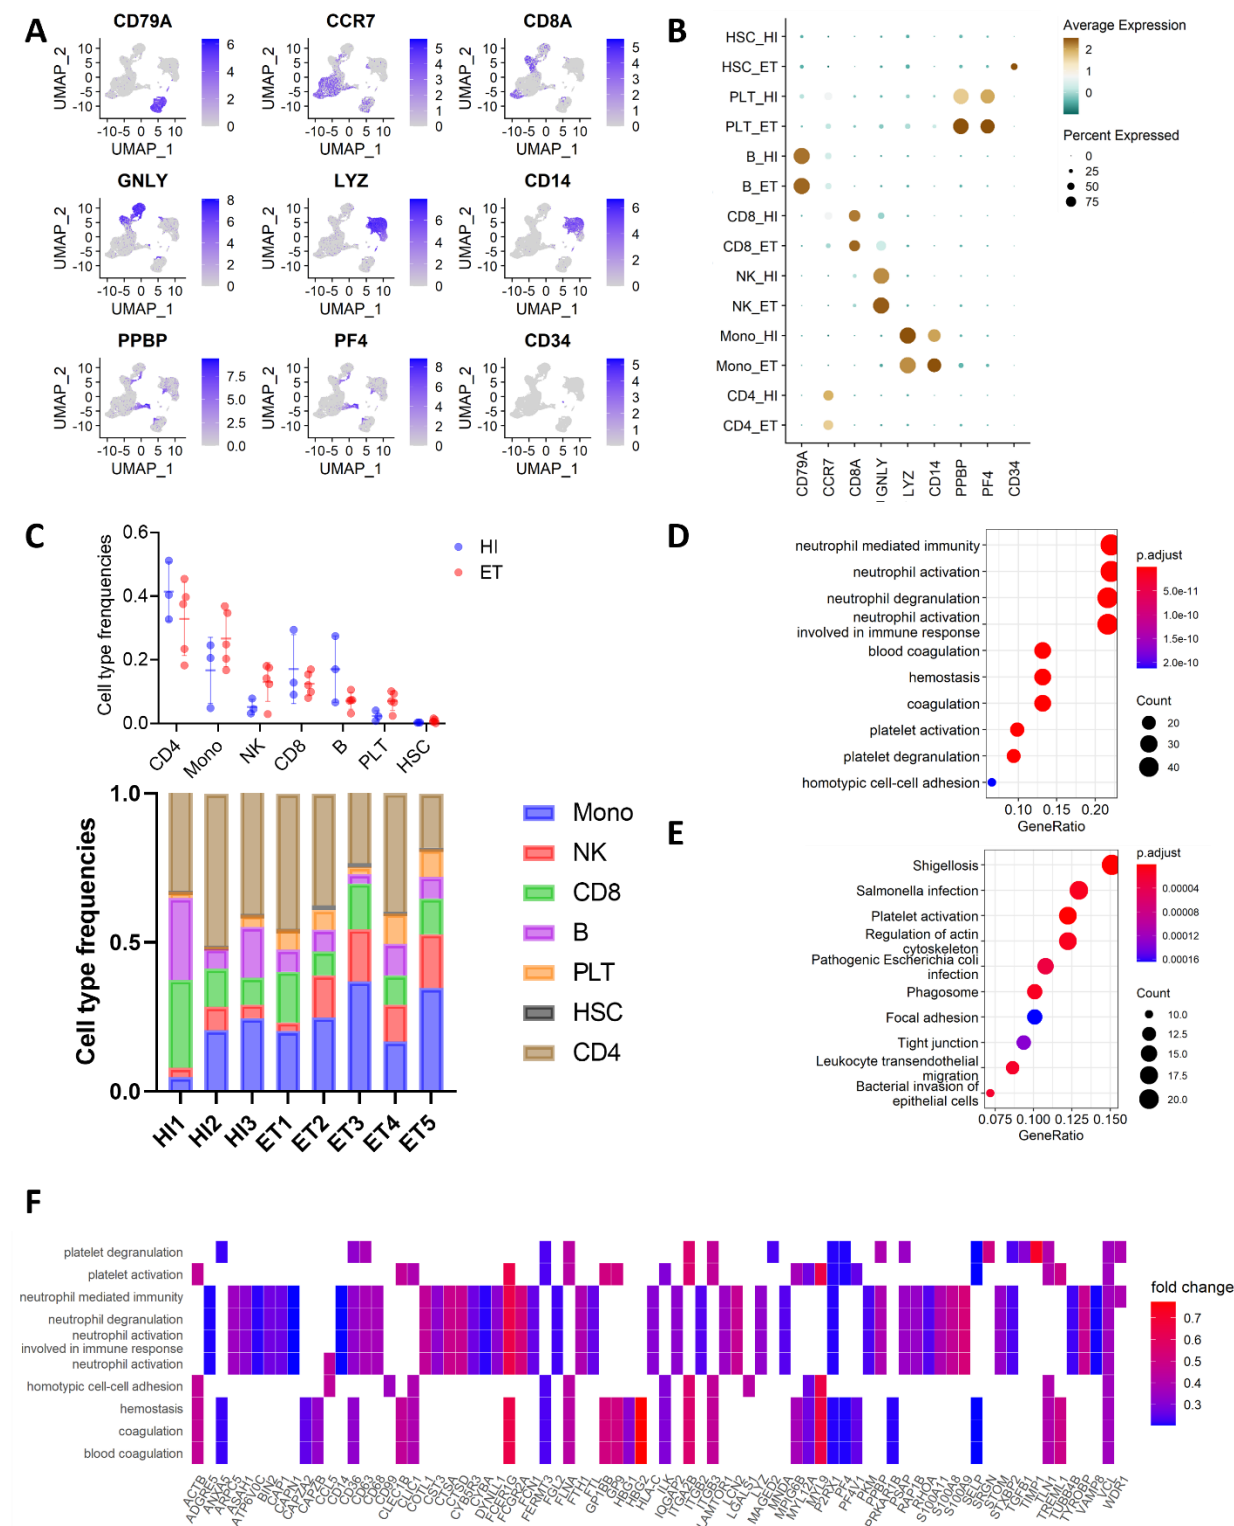

Figure S2

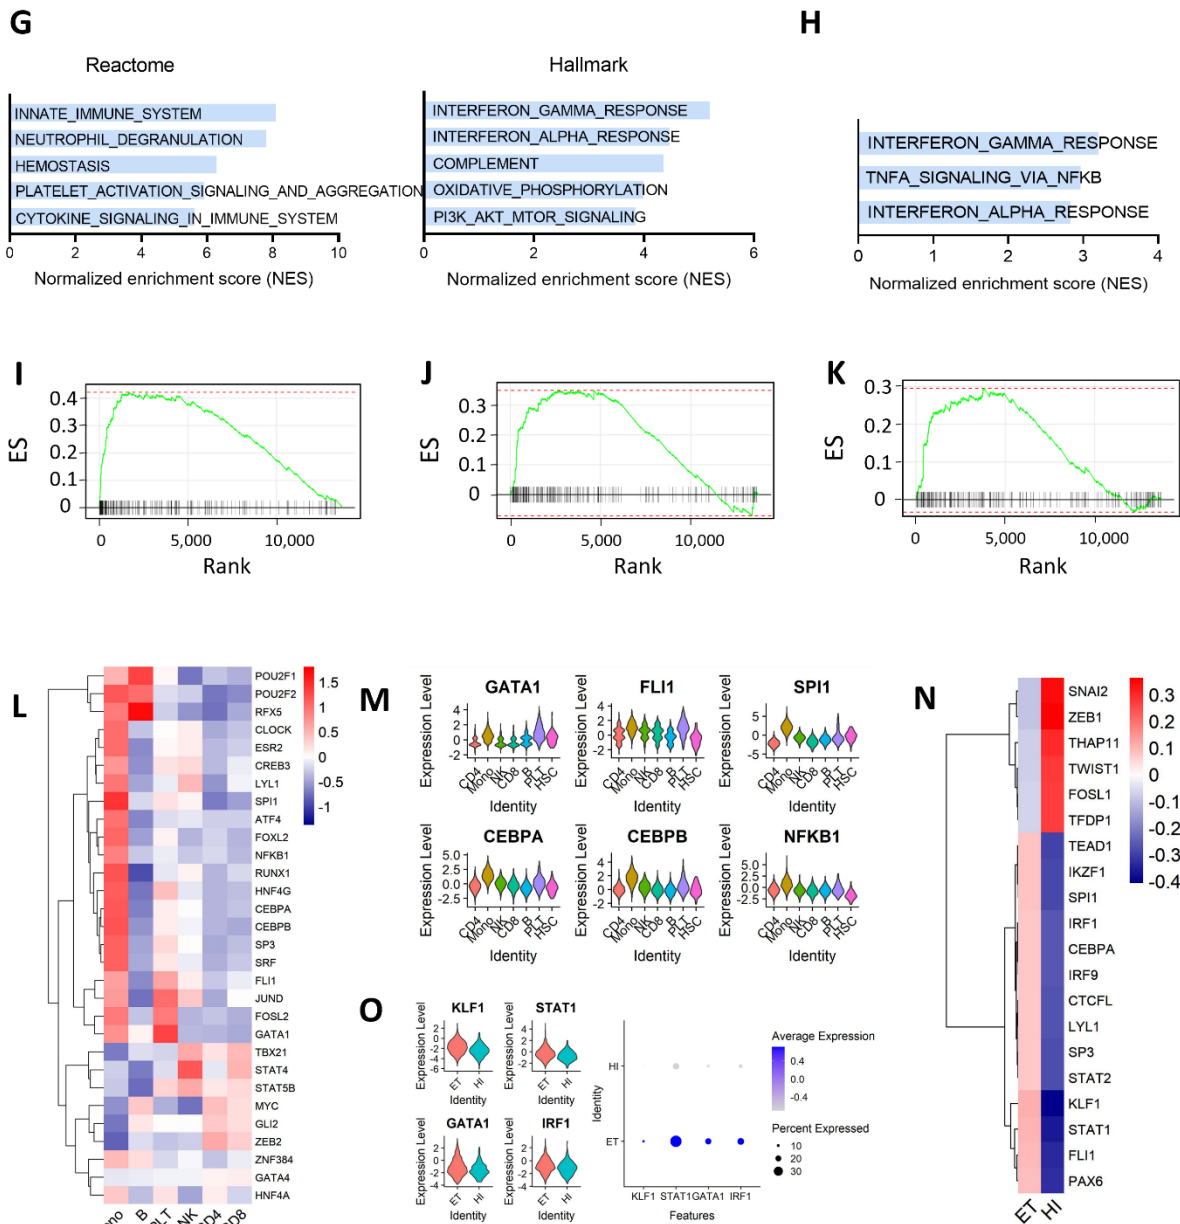

## **Figure S2. scRNA-seq analysis.**

- A) Feature plots of genes for cell type identification.
- B) Dot plot of top differentially expressed genes for cell type identification.
- C) Dot plot and stacked bar plot showing frequency of different type of cells in all 8 samples for scRNA-seq.
- D) GO enrichment analysis of differentially-expressed genes (DEGs) in platelets from ET vs. HI.
- E) KEGG enrichment analysis of DEGs in platelets from ET vs. HI.
- F) Heatmap showing the distribution of DEGs in GO enrichment pathways.
- G) Bar plot showing top 5 reactome and hallmark pathways enriched in platelets from ET vs. HI.
- H) Bar plot showing top 3 hallmark pathways enriched in platelets from ET carrying *JAK2* mutations vs. ET carrying *CALR* mutations.
- I) GSEA enrichment plots for “reactome platelet activation signaling and aggregation” gene set enriched in platelets from ET vs. HI.
- J) GSEA enrichment plots for “hallmark IFN- $\gamma$  response” gene set enriched in platelets from ET vs. HI.
- K) GSEA enrichment plots for “hallmark OXPHOS” gene set enriched in platelets from ET vs. HI.
- L) Heatmap showing top 20 most variable transcriptional factors (TFs) in each type of cells based on VIPER scores on DoRothEA’s regulons.
- M) Violin plots showing the expression of representative TFs in each type of cells.
- N) Heatmap showing top 20 most variable TFs in platelets from ET vs. HI.
- O) Violin plots and dot plots showing the expression of representative TFs in platelets from ET and HI.

Figure S3

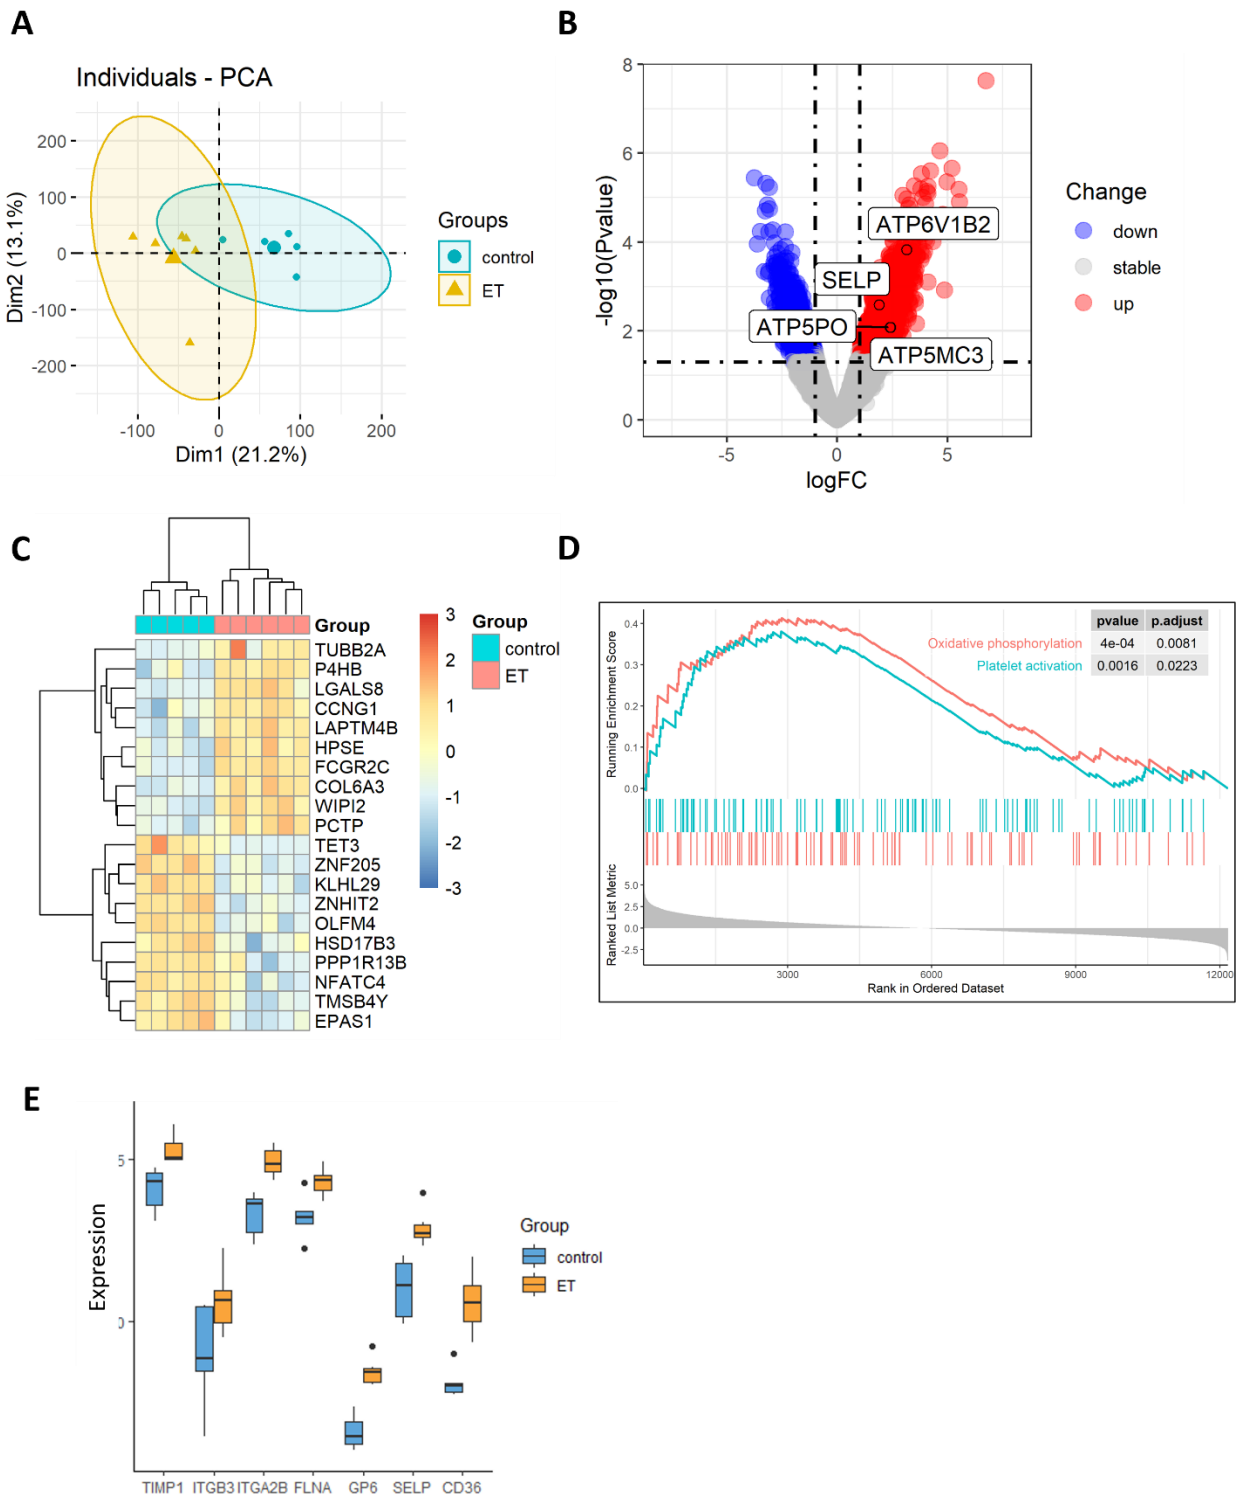

**Figure S3. Analysis of GSE2006 microarray between platelets from HIs and ET patients.**

A) PCA plot of platelets from ET (n = 6) and HI (n = 5) in GSE2006.

B) Volcano plot showing differentially expressed genes (DEG) between platelets from ET and HI in GSE2006.

C) Heatmap of top 10 DEGs in HI and ET in GSE2006.

D) GSEA enrichment plots for “hallmark OXPHOS” and “reactome platelet activation signaling and aggregation” gene sets enriched in platelets from ET.

E) Bar plot showing expression of representative genes in GSE2006 ( $|\text{fold change}| > 2$  &  $P < 0.05$ ).

Figure S4

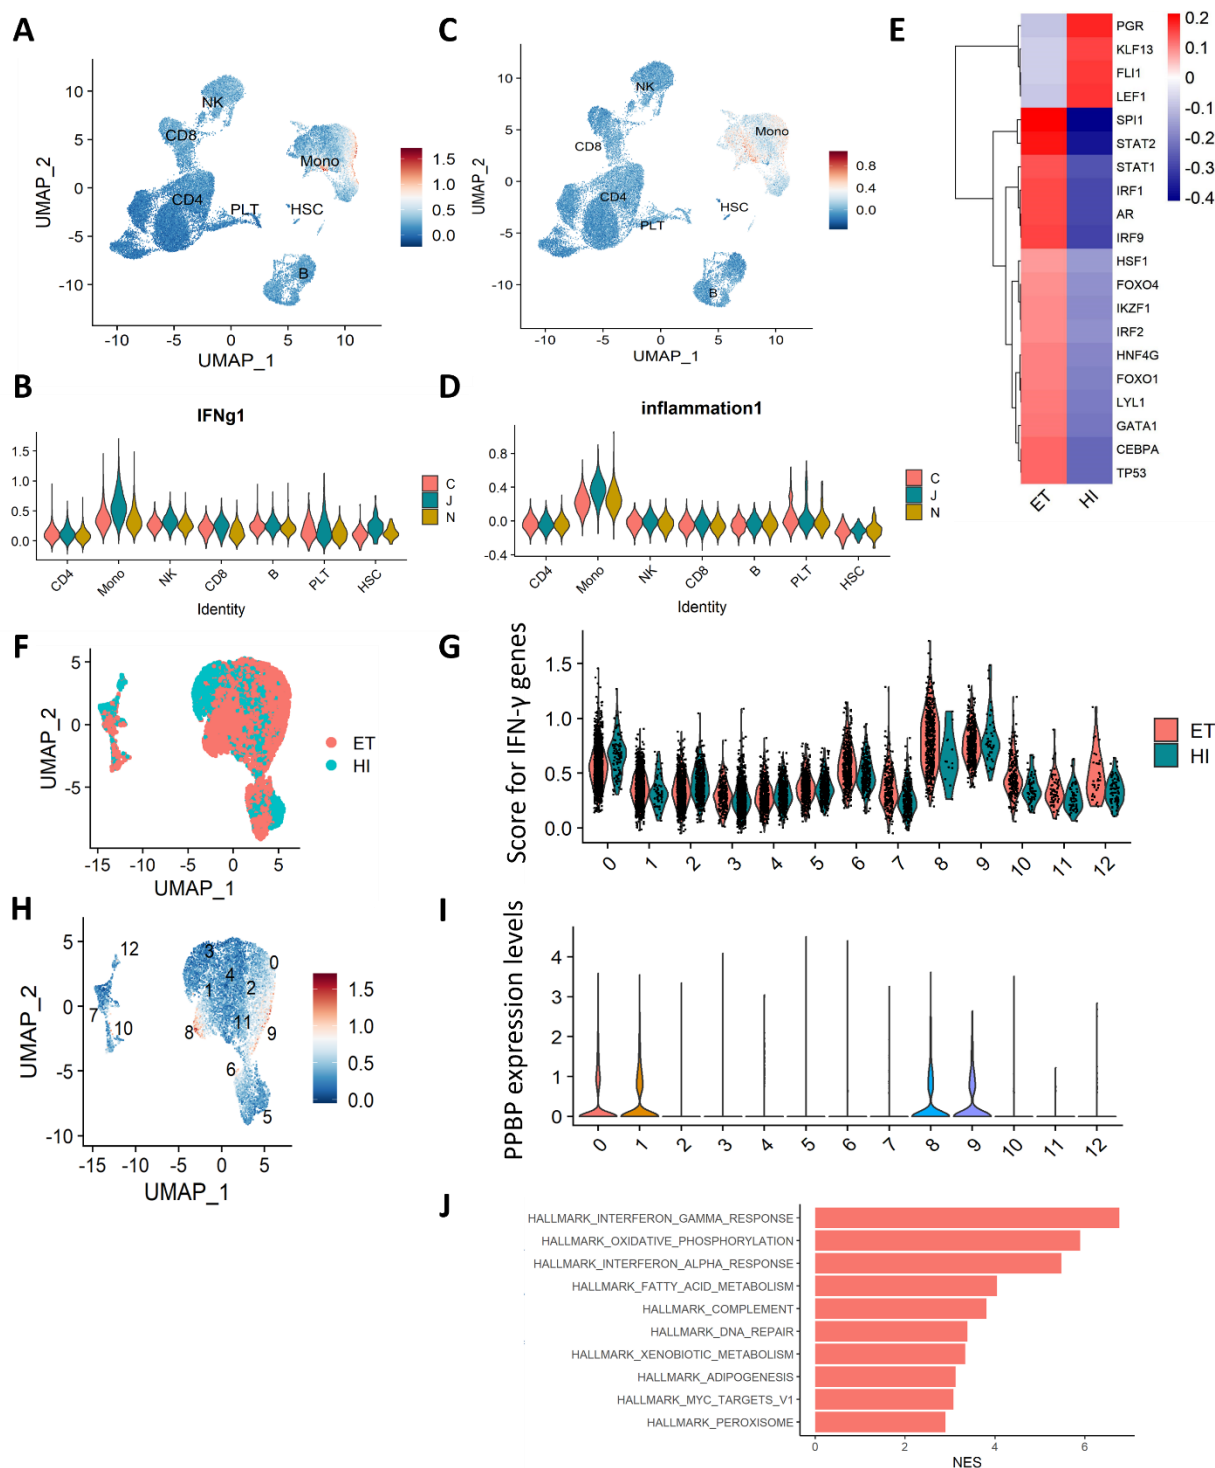



**Figure S4. scRNA-seq analysis of monocytes.**

A) UMAP plot showing scores for genes in “hallmark interferon gamma response” gene set.

B) Violin plot showing scores for genes in “hallmark interferon gamma response” gene set (C: ET with CALR mutations; J: ET with JAK2 mutation; N: HI).

C) UMAP plot showing scores for genes in “hallmark inflammatory response” gene set.

D) Violin plot showing scores for genes in “hallmark inflammatory response” gene set (C: ET with CALR mutations; J: ET with JAK2 mutation; N: HI).

E) Heatmap showing top 20 most variable TFs in monocytes from ET vs. HI.

F) UMAP plot showing scores for genes in “hallmark interferon gamma response” gene set in monocytes from HI and ET.

G) Violin plot showing scores for genes in “hallmark interferon gamma response” gene set in monocytes from HI and ET.

H) UMAP plot showing PPBP (a marker for platelets) expression levels in monocytes from HI and ET.

I) Violin plots showing PPBP (a marker for platelets) expression levels in monocytes from HI and ET.

J) Bar plot showing top 10 hallmark pathways enriched in monocytes from ET vs. HI.

Figure S5

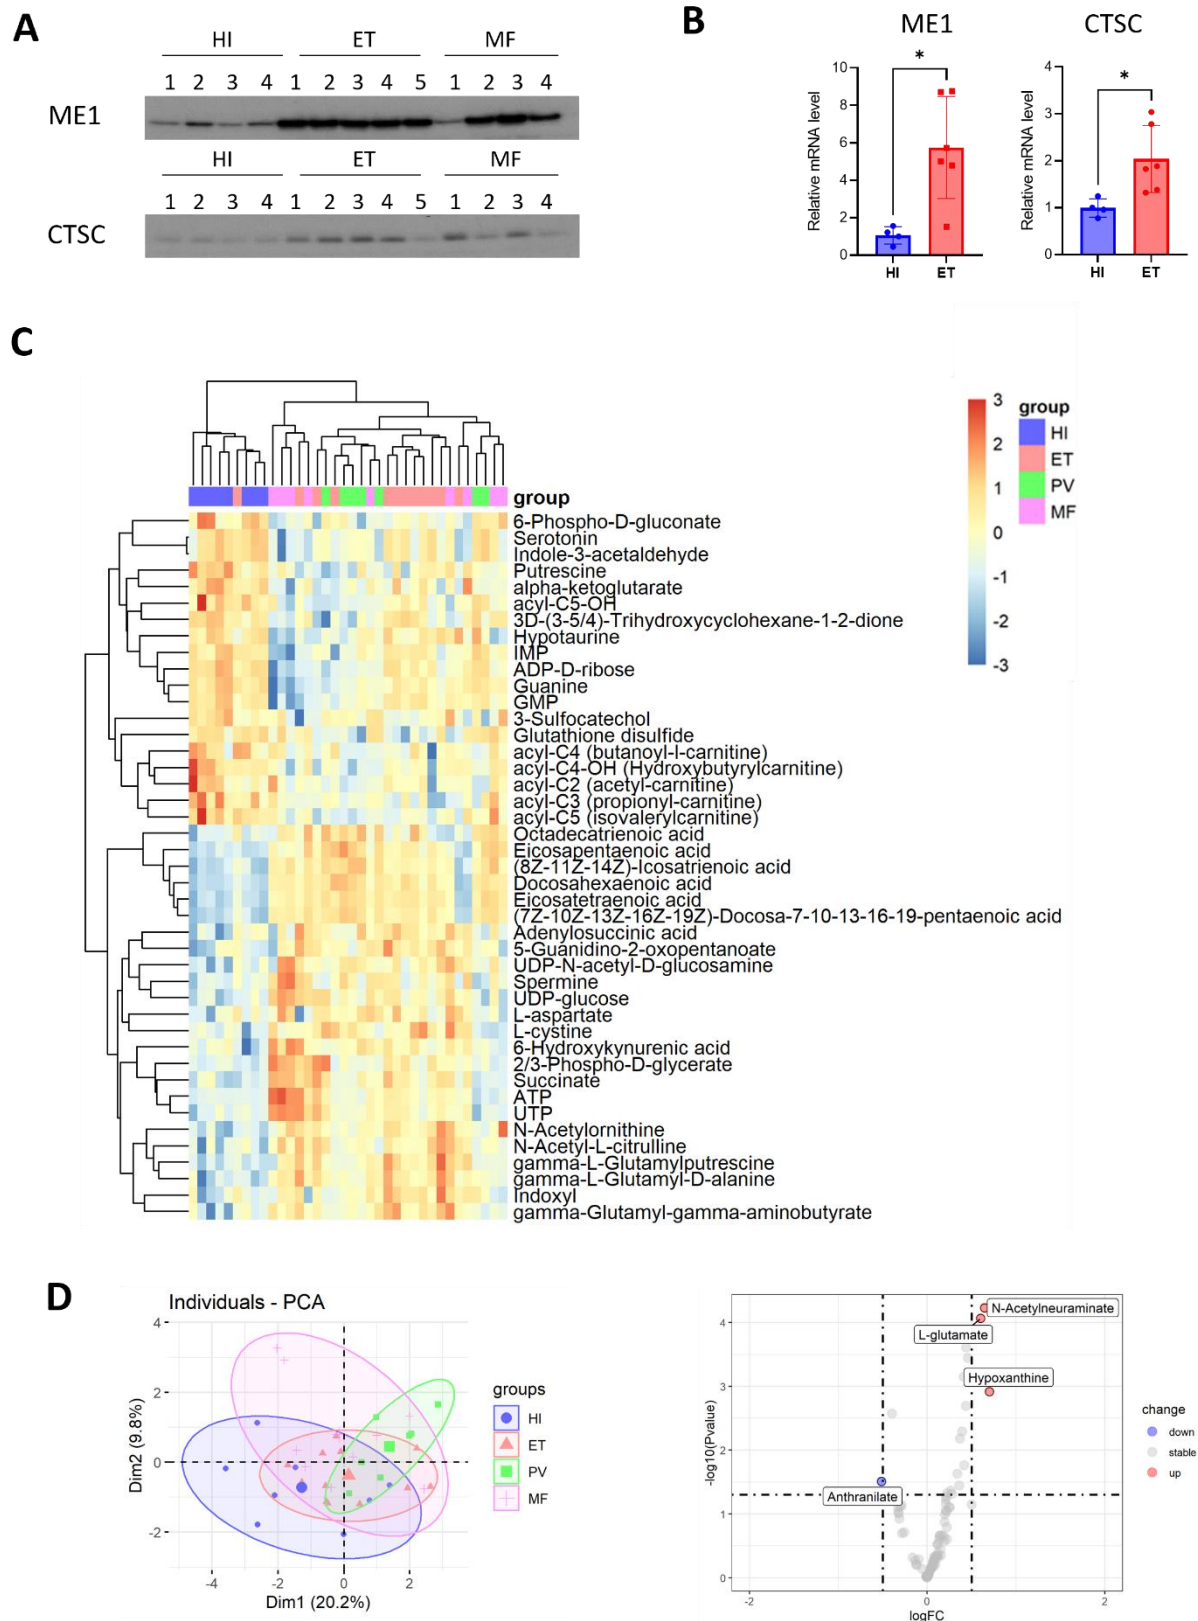

**E**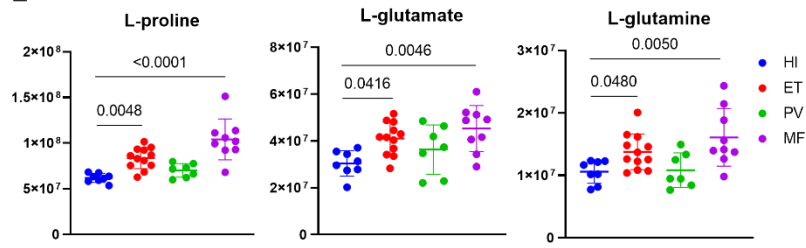**G**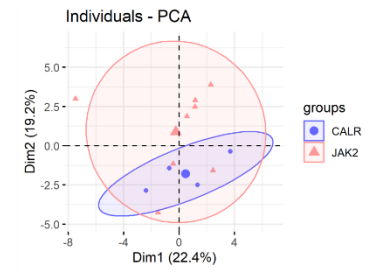**F**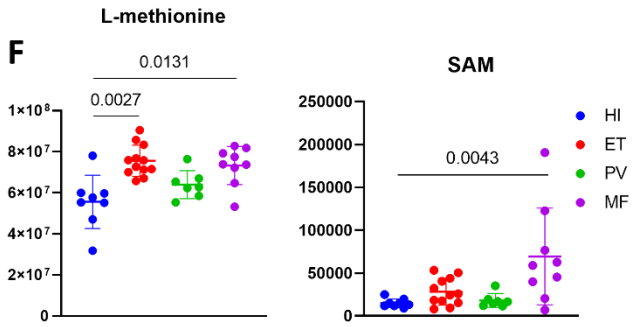**H**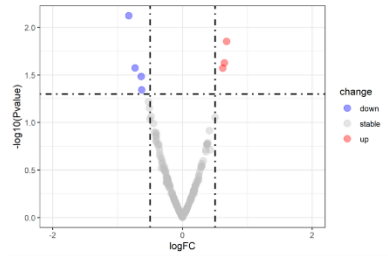

**Figure S5. Platelet and plasma proteomics and metabolomics analysis.**

A) Protein levels of ME1 and CTSC in washed platelets from HI and MPN.

B) Relative gene expression of ME1 and CTSC in washed platelets from HI and MPN.

C) Heatmap of down- (n = 19) and up-regulated (n = 24) metabolites in platelets between ET and HI ( $P < 0.05$ ,  $|\text{fold change}| > 2^{0.5}$ ).

D) PCA plot and volcano plot of plasma DAMs between MPN and HI.

E) Dot plots of peak areas (arbitrary units after normalization) for proline, glutamate and glutamine of platelet. Statistics were assessed by one-way ANOVA. P values are marked if  $< 0.05$ .

F) Dot plots of peak areas (arbitrary units after normalization) for methionine and SAM of platelet. Statistics were assessed by one-way ANOVA. P values are marked if  $< 0.05$ .

G) PCA scores plot of metabolites LC-MS data of platelets from ET (JAK = 8, CALR = 4) displayed with 80% confidence region.

H) Volcano plot of metabolite changes in ET carrying JAK2 (n = 8) vs. ET carrying CALR (n = 4) mutations. Red dots denote significant ( $p < 0.05$ ) and fold change ( $> 2^{0.5}$ ) features, blue dots denote significant ( $p < 0.05$ ) and fold change ( $< -2^{0.5}$ ) features.

Figure S6

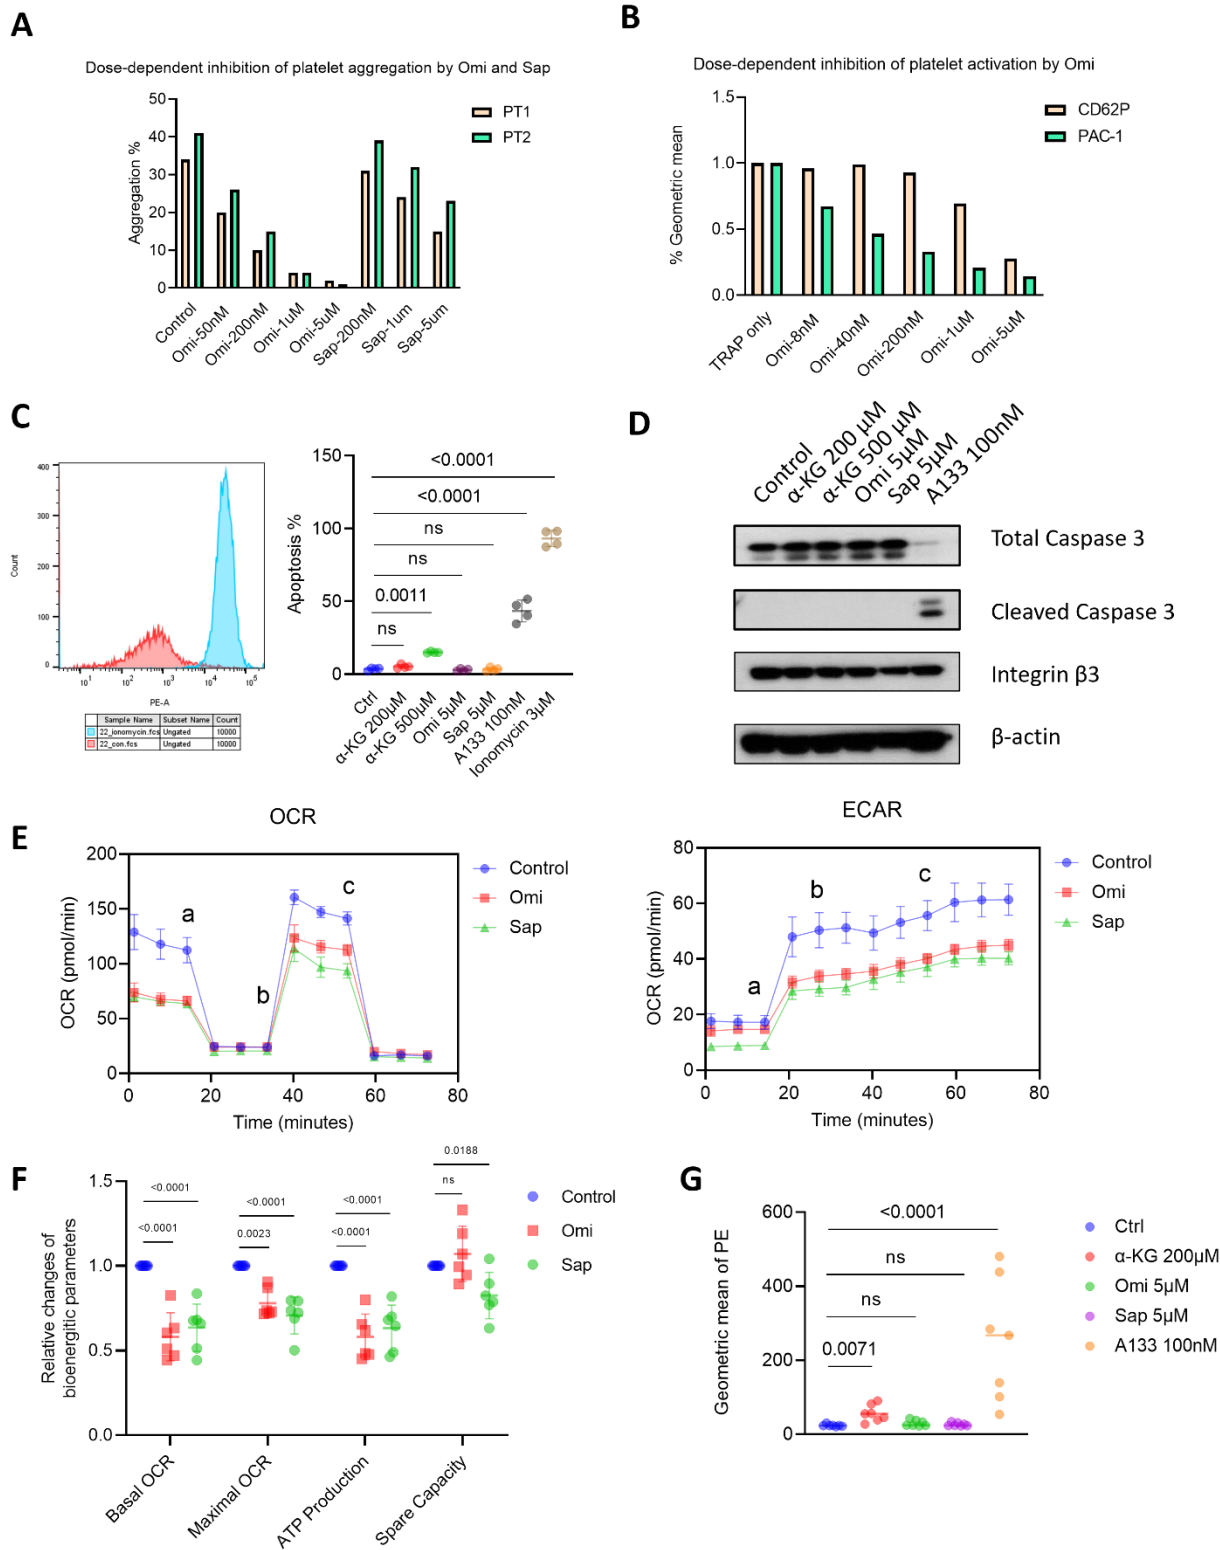

**Figure S6. Effects of mTOR inhibitors and  $\alpha$ -KG on platelets and cell lines.**

A) Bar plot showing the effects of omipalisib or sapanisertib on MPN platelet aggregation. Washed platelets were incubated with omipalisib or sapanisertib for one hour followed by platelet aggregation analysis with 5  $\mu$ M TRAP6 stimulation.

B) Bar plot showing the effects of omipalisib on MPN platelet activation. Washed platelets were incubated with omipalisib for one hour followed by 1  $\mu$ M TRAP6 stimulation and flow cytometry analysis.

C) Representative image and dot plot showing the induction of apoptosis of washed MPN platelets. Washed platelets were treated with reagents as shown for one hour followed by annexin V apoptosis assay and flow cytometry analysis. Statistics were assessed by one-way ANOVA.

D) Immunoblots of washed platelets showing the induction of apoptosis. Washed MPN platelets were incubated with different treatments for one hour followed by immunoblots.

E) Representative OCR and ECAR profiles of MPN platelets (a: Oligomycin A; b: FCCP; c: Rotenone/antimycin A).

F) Quantification of basal OCR, ATP production, maximal OCR and spare capacity profiles of washed MPN platelets (n = 6). Data were normalized to DMSO group set as 1. Data are mean  $\pm$  SD. Statistics were assessed by two-way ANOVA.

G) Dot plot showing geometric mean fluorescence intensity of washed MPN platelets after different treatments for one hour followed by MitoSOX-based flow cytometry analysis (n = 7). Statistics were assessed by paired one-way ANOVA.

**Figure S7**

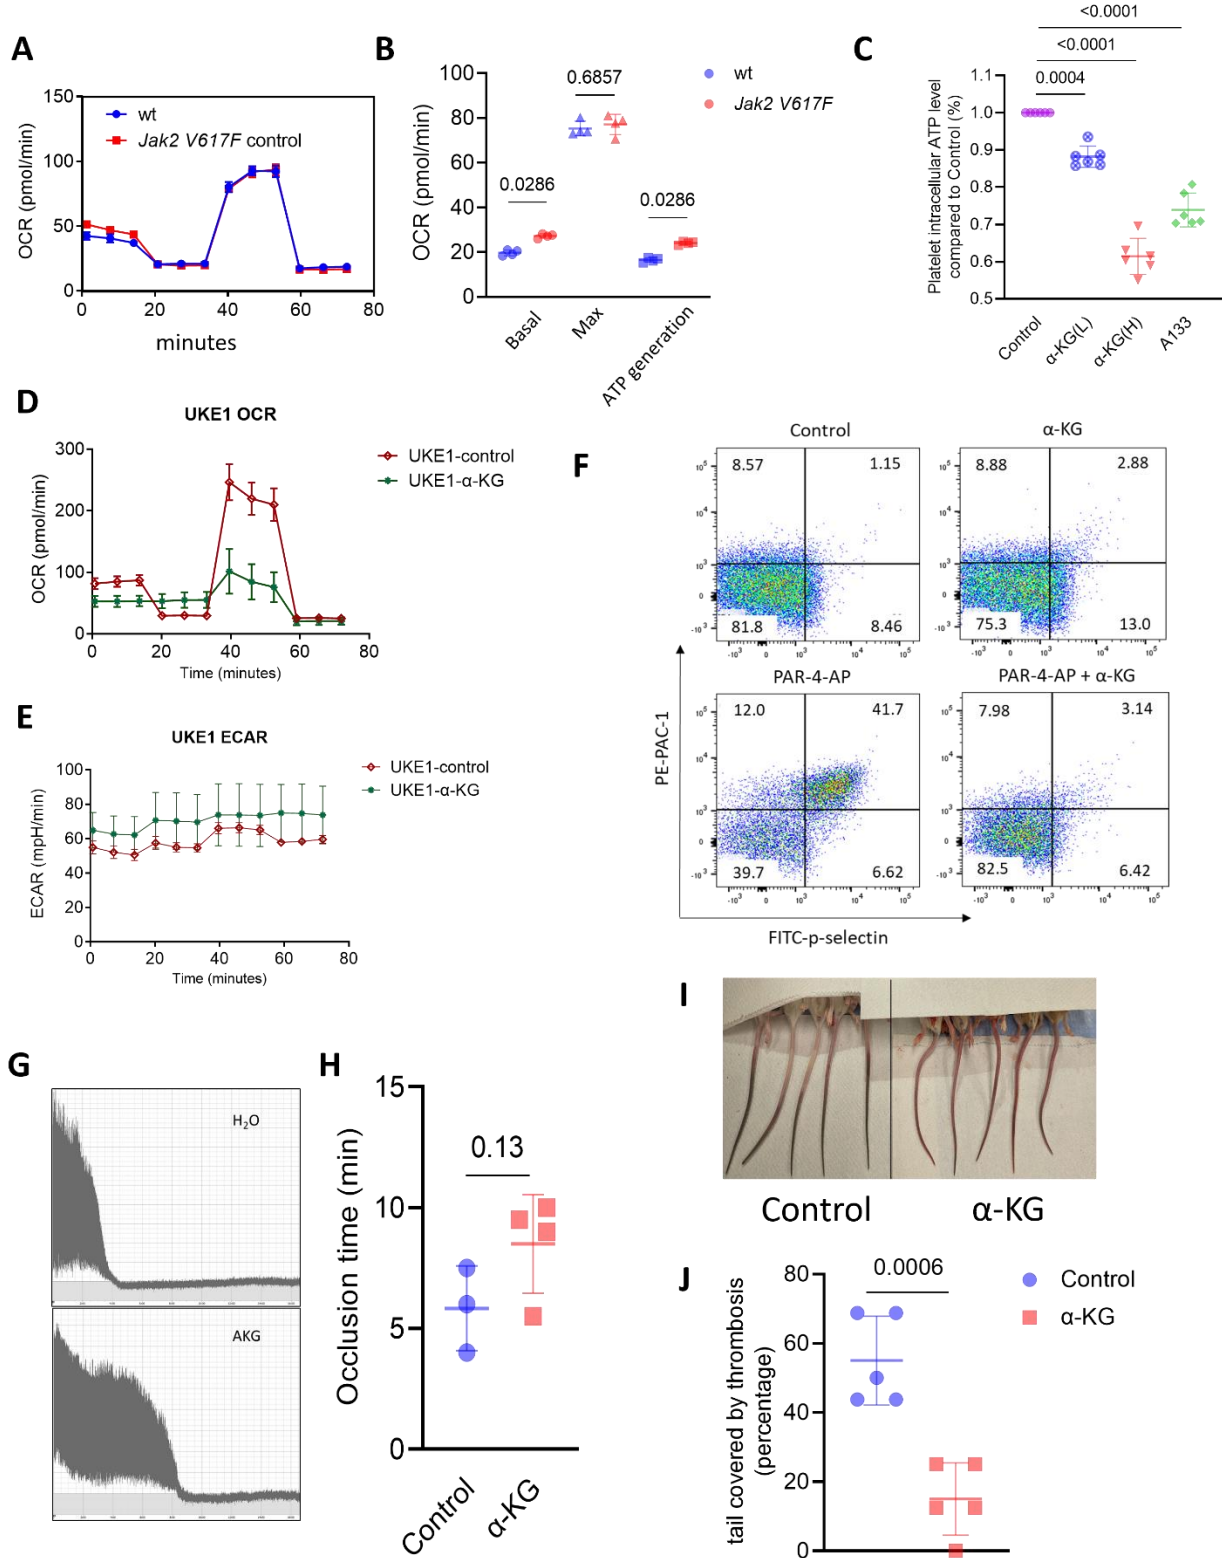

**K**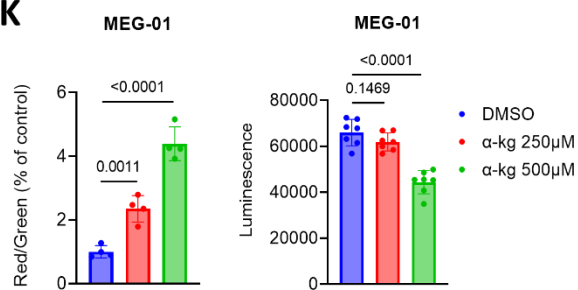**L**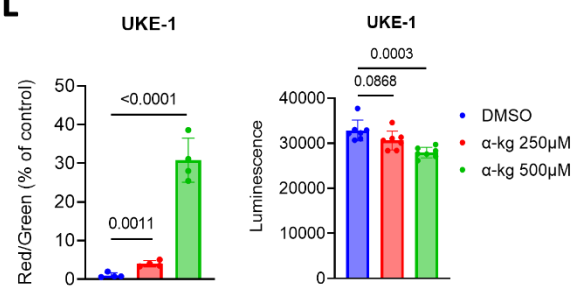**M**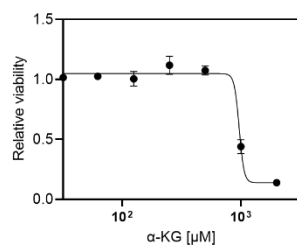**N**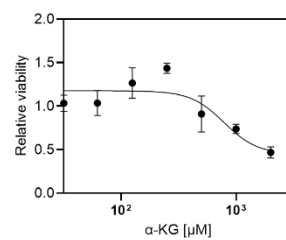



**Figure S7. Effects of  $\alpha$ -KG on mouse platelets, cell lines and thrombosis mouse models.**

A) Representative OCR profiles of platelets from wild type and *Jak2 V617F* knock-in mice.

B) Quantification of mitochondrial respiration parameters ( $n = 4$ ) of platelets from wild type and *Jak2 V617F* knock-in mice. Data are mean  $\pm$  SD. Statistics were assessed by two-tailed Mann-Whitney U test.

C) Quantification of intracellular ATP level changes of washed MPN platelets after different treatments for one hour ( $n = 6$ ). Data were normalized to control group set as 1. Data are mean  $\pm$  SD. Statistics were assessed by one-way ANOVA.

D) Representative OCR profiles of UKE-1 cells with the incubation of Octyl- $\alpha$ -KG or DMSO.

E) Representative ECAR profiles of UKE-1 cells with the incubation of Octyl- $\alpha$ -KG or DMSO.

F) Representative images showing effects of  $\alpha$ -KG on activation of washed platelets from *Jak2 V617F* knock-in mice. Washed platelets from *Jak2 V617F* knock-in mice were treated with Octyl- $\alpha$ -KG for one hour followed by PAR-4-AP stimulation and flow cytometry analysis.

G) Representative image showing blood flow in the carotid artery following FeCl<sub>3</sub>-induced injury until complete vessel occlusion. *Jak2 V617F* mice were fed with either regular water ( $n = 3$ ) or 2%  $\alpha$ -KG ( $n = 4$ ) water for 12 days before FeCl<sub>3</sub>-induced vascular injury.

H) Statistical analysis of vessel occlusion time. Data are mean  $\pm$  SD. Statistics were assessed by two-tailed Student's t test.

I) Tail thrombosis images. BALB/c mice were fed with either regular water ( $n = 5$ ) or 2%  $\alpha$ -KG ( $n = 5$ ) water for 10 days before intraperitoneal injection of 100  $\mu$ l carrageenan (10mg/ml). Tail thrombosis were observed 48 hours after carrageenan injection.

J) Statistical analysis of tail thrombosis percentage. Data are mean  $\pm$  SD. Statistics were assessed by two-tailed Student's t test.

K) Bar plot showing the effects of  $\alpha$ -KG on mitochondrial membrane potential (left) and intracellular ATP level (right) in MEG-01 cells determined by JC-1 dye staining and ATPlite luminescence assay.

L) Bar plot showing the effects of  $\alpha$ -KG on mitochondrial membrane potential (left) and intracellular ATP level (right) in UKE-1 cells determined by JC-1 dye staining and ATPlite luminescence assay.

M) Cell viability curve showing the effects of  $\alpha$ -KG on the proliferation of MEG-01 cells after 72 hours ( $IC_{50} = 967.5\mu M$ ).

N) Cell viability curve showing the effects of  $\alpha$ -KG on the proliferation of UKE-1 cells after 72 hours ( $IC_{50} = 785.6\mu M$ ).

Figure S8

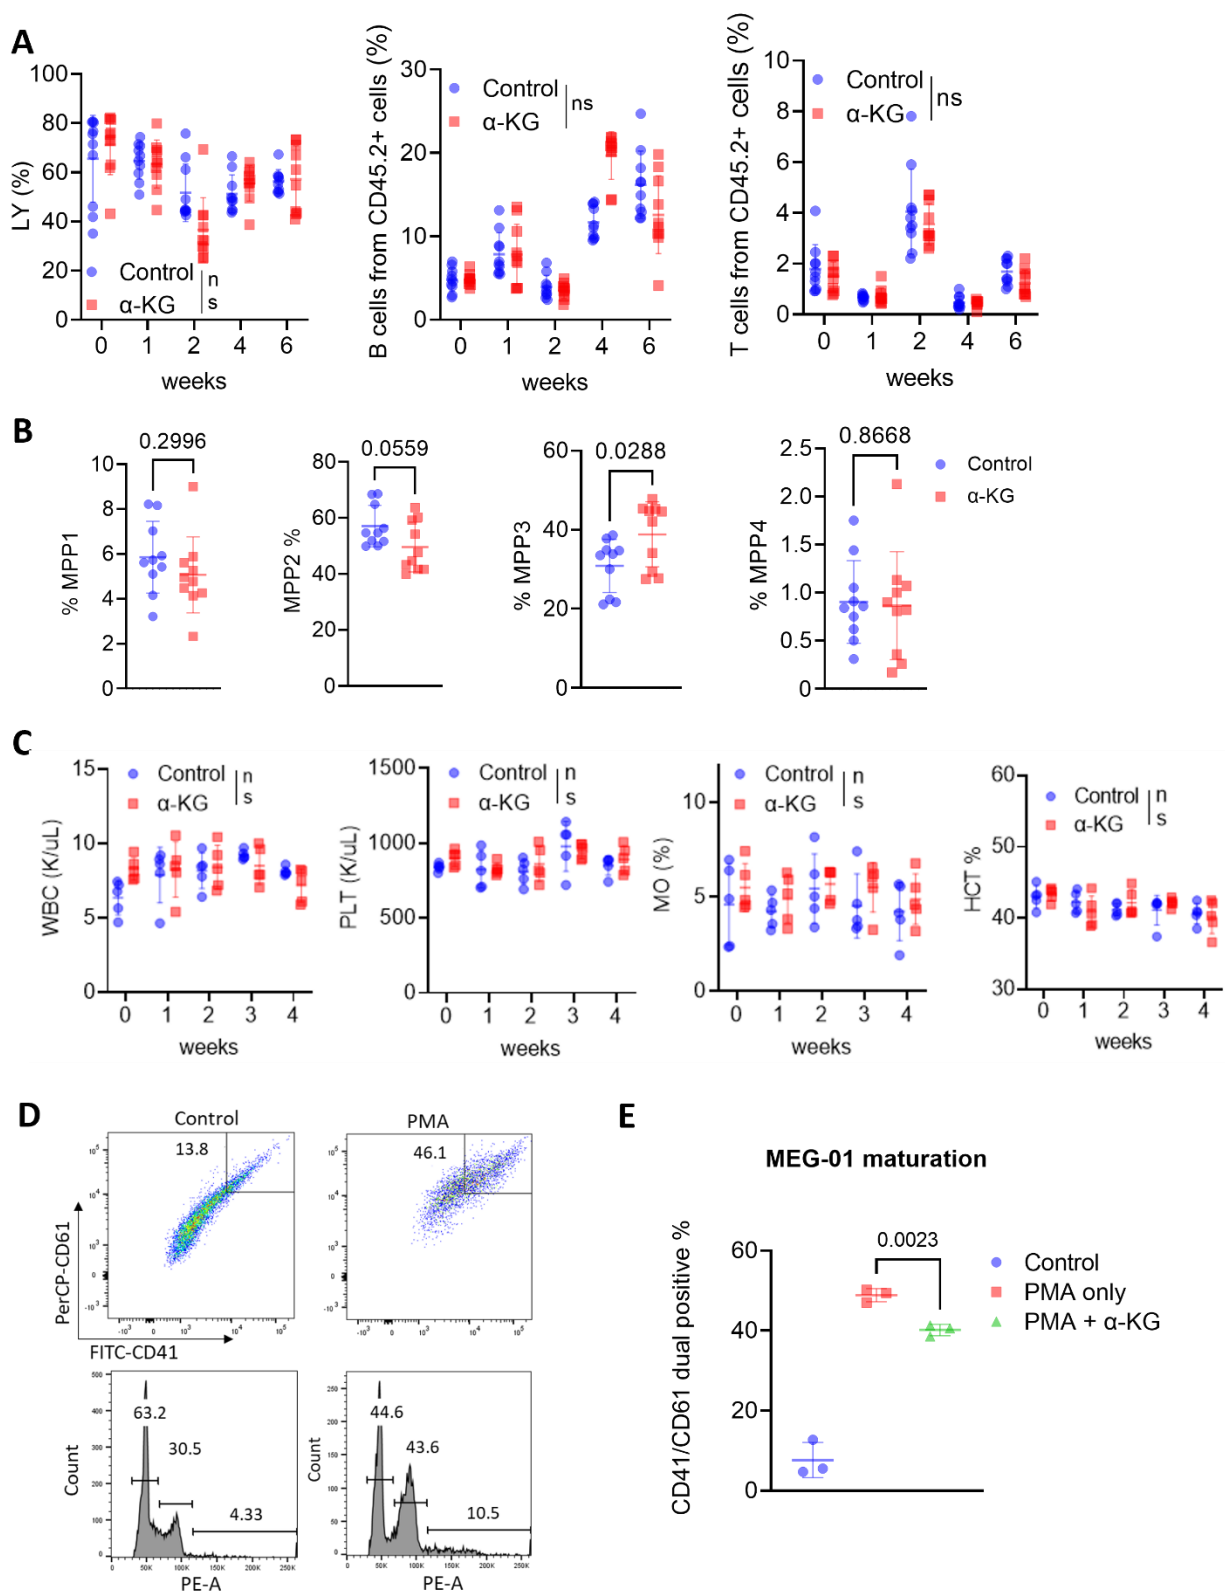

**Figure S8. *in vivo* treatment of  $\alpha$ -KG inhibited MPN progression.**

A) Lymphocytes (LY), B and T cell ratios from *Jak2 V617F* transplanted mice treated with vehicle or  $\alpha$ -KG across multiple timepoints. Data are mean  $\pm$  SD. Statistics were assessed by two-way ANOVA with Dunnett's multiple comparisons test (ns: not significant,  $P > 0.05$ ).

B) Percentage of MPPs from *Jak2 V617F* transplanted mice treated with vehicle or  $\alpha$ -KG. Data are mean  $\pm$  SD. Statistics were assessed by two-tailed Student's t test.

C) WBC, platelet counts, monocytes and HCT ratios from wild type C57BL/6J mice treated with vehicle ( $n = 5$ ) or  $\alpha$ -KG ( $n = 5$ ) across multiple timepoints. Data are mean  $\pm$  SD. Statistics were assessed by two-way ANOVA with Dunnett's multiple comparisons test (ns: not significant,  $P > 0.05$ ).

D) Representative images showing the maturation of MEG-01 cells with PMA treatment (CD41/CD61 expression and ploidy analysis by flow cytometry)

E) Quantification of percentages of CD41/CD61 dual positive cells with  $\alpha$ -KG treatment. Data are mean  $\pm$  SD. Statistics were assessed by two-tailed Student's t test. MEG-01 cells were treated with PMA for 2 days with 500  $\mu$ M Octyl- $\alpha$ -KG or DMSO control. The ratio of CD41- and CD61-dual positive cells were determined by flow cytometry ( $n = 3$ ). Ploidy analysis was determined by propidium iodide (PI) staining.

Figure S9

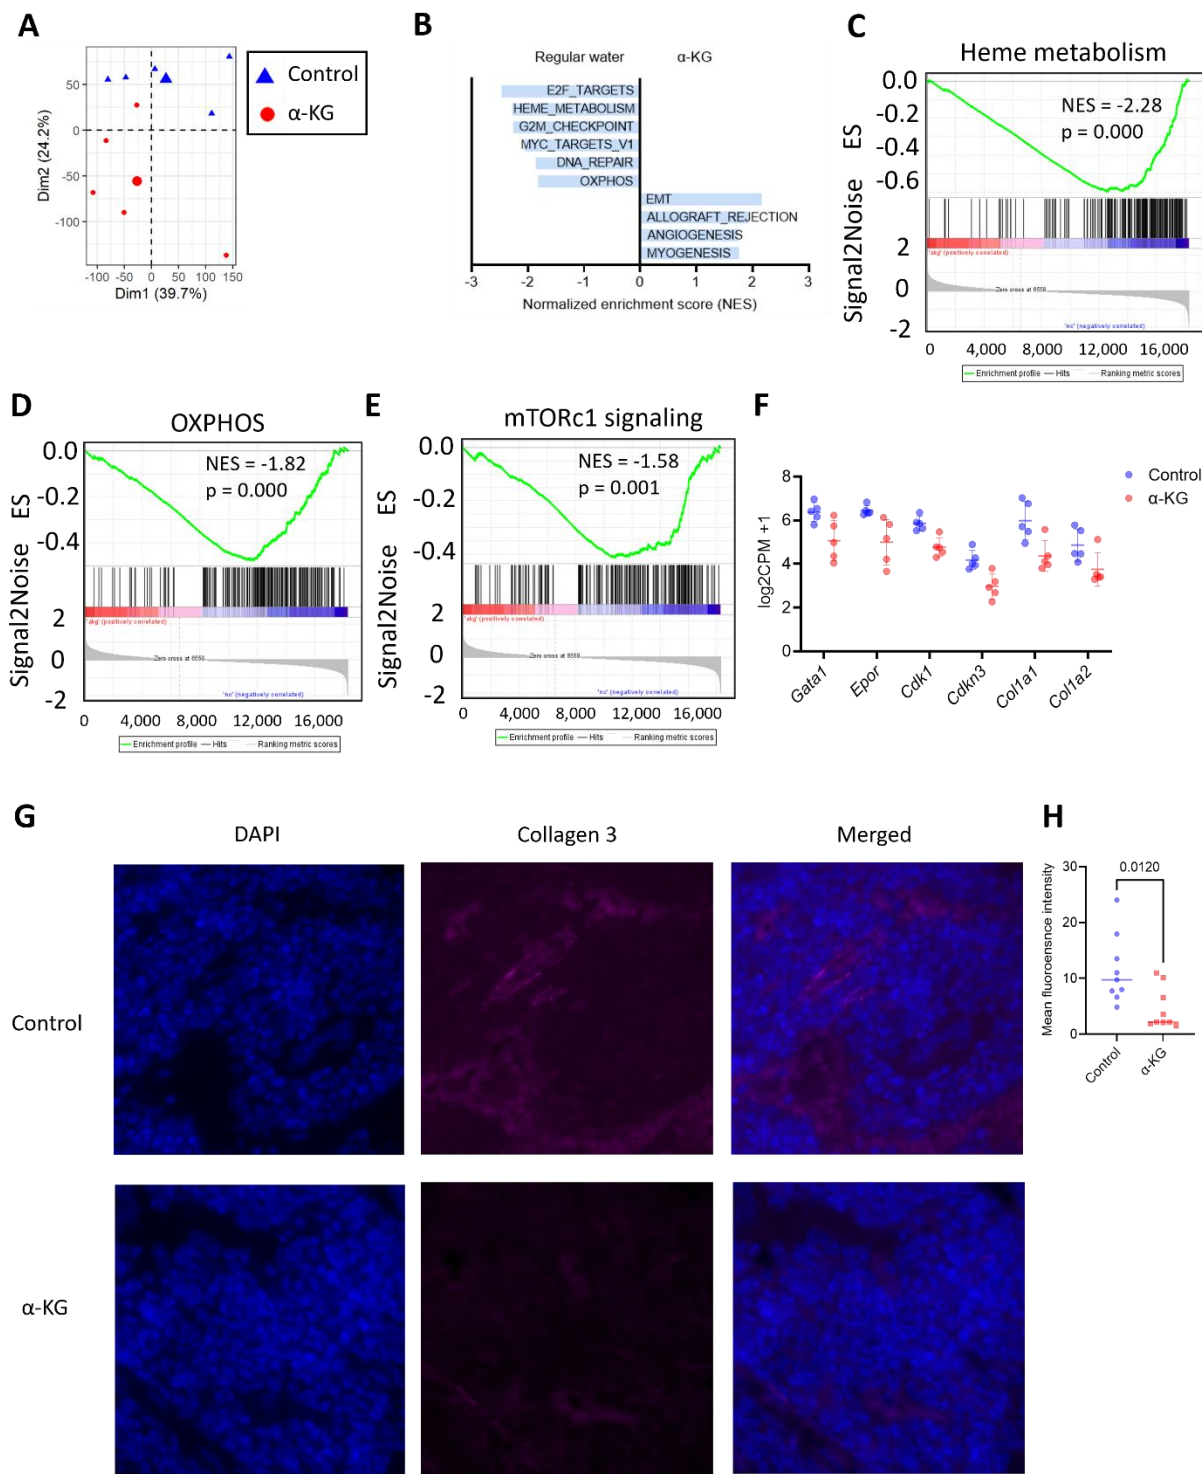

**Figure S9. Bulk RNA-seq of bone marrow from control (n = 5) and 1%  $\alpha$ -KG-supplemented *Jak2* V617F transplanted mice (n = 5) and collagen staining.**

- A) PCA plot for bulk RNA-seq data of bone marrow from control and  $\alpha$ -KG-supplemented mice.
- B) Bar plot of top 10 hallmark pathways with the highest GSEA enrichment scores when comparing between control and  $\alpha$ -KG-supplemented groups.
- C) GSEA enrichment plots for “Oxidative phosphorylation” gene set enriched in control vs.  $\alpha$ -KG-supplemented mice.
- D) GSEA enrichment plots for “Heme metabolism” gene set enriched in control vs.  $\alpha$ -KG-supplemented mice.
- E) GSEA enrichment plots for “mTORc1 signaling” gene set enriched in control vs.  $\alpha$ -KG-supplemented mice.
- F) Dot plot of RNA-seq counts of representative genes ( $|\text{fold change}| > 2^{0.5}$  &  $P < 0.05$ ).
- G) Representative immunofluorescence images (X100) of femur sections stained for collagen III (magenta); nuclei were stained blue with DAPI. Control and  $\alpha$ -KG-supplemented mice were analyzed 6 weeks after  $\alpha$ -KG supplementation.
- H) Normalized fluorescence intensity for collagen III. Data are mean  $\pm$  SD. Statistics were assessed by Welch's t test.

Figure S10

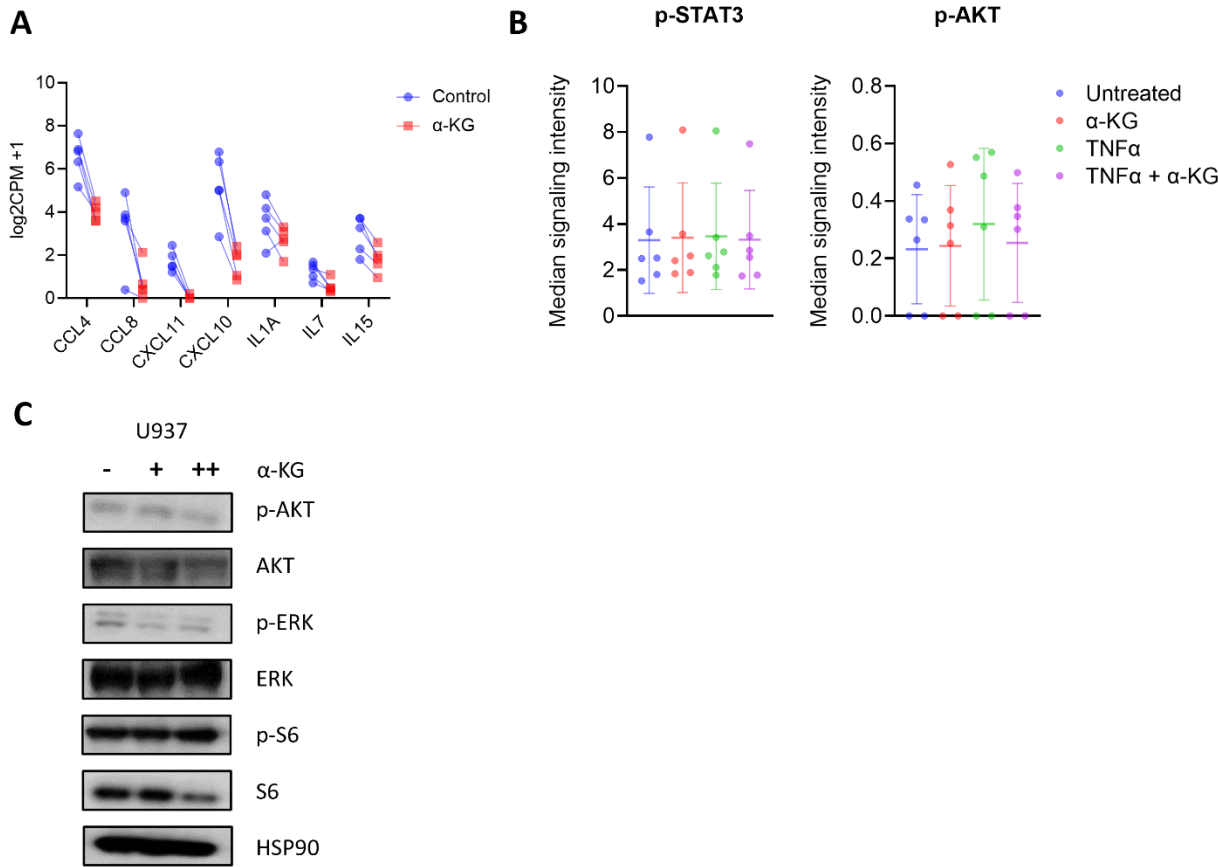

**Figure S10. Effects of  $\alpha$ -KG on monocyte gene expression and signaling pathways.**

A) Dot plot of RNA-seq counts of representative chemokine and cytokine genes in CD14<sup>+</sup> monocytes (fold change < -2,  $P < 0.05$ ).

B) Dot plots of intracellular pathways of monocytes in peripheral blood of MPN patients by mass cytometry. Whole blood from MPN patients ( $n = 6$ ) were incubated with Octyl- $\alpha$ -KG or DMSO for 1 hour followed by the stimulation of TNF $\alpha$ . Samples were processed for the determination of intracellular pathway activities by CyTOF. Data are mean  $\pm$  SD.

C) Immunoblots of U937 cells after  $\alpha$ -KG treatment. U937 cells were incubated with 250  $\mu$ M or 500  $\mu$ M Octyl- $\alpha$ -KG for one hour followed by immunoblot analysis.



## **Supplementary methods**

### **Measurement of apoptosis markers in platelets**

Surface exposure of phosphatidylserine was assessed in washed platelets by measuring the binding of PE-labelled annexin V (BD Biosciences). Washed platelets were resuspended in annexin V binding buffer (10 mM HEPES, 10 mM sodium hydroxide, 140 mM sodium chloride, 2.5 mM calcium chloride, pH 7.4), incubated with different reagents for 1 hour followed by annexin V staining for 15 minutes at room temperature in the dark. Positive control group was incubated with 3  $\mu$ M ionomycin during annexin V staining. The samples were analyzed by flow cytometry. Washed platelets were resuspended in Modified Tyrode's buffer. After being incubated with different reagents for 1 hour, platelets were pelleted and lysed for immunoblot analysis of caspase-3 cleavage.

### **Determination of intracellular ATP level**

Intracellular ATP levels were determined by ATPlite Luminescence Assay (PerkinElmer).  $10^5$  cells or  $3 \times 10^7$  platelets were adjusted in 100  $\mu$ l of cell suspension followed by the addition of 50  $\mu$ l/well of mammalian cell lysis solution. The plate was left on orbital shaker for 5 minutes at 700 rpm. After Adding 50  $\mu$ L/well of substrate solution, plate was shaken for another 5 minutes and incubated for 10 minutes at RT to stabilize the luminescent signal in the dark. Luminescence signals were collected on plate reader.

### **Murine model of FeCl<sub>3</sub>-induced carotid artery thrombosis**

14-week-old *Jak2 V617F* mice were supplemented with regular water (n = 3) or 2%  $\alpha$ -KG (n = 4) for 12 days. FeCl<sub>3</sub>-induced carotid artery thrombosis was induced as previously described (1). Mice were anesthetized, and the right common carotid artery was isolated and a flow probe (Transonic Systems, NY) was placed under the isolated carotid artery to monitor blood flow. Filter paper soaked with 5% FeCl<sub>3</sub> solution was placed upon the carotid artery surface for 2.5 minutes,

followed by flushing with warmed saline to remove residue FeCl<sub>3</sub> solution. Flow rate and vessel occlusion was monitored up to 30 minutes using Powerlab, and analyzed using LabChart Pro version 8.1 (ADInstruments, CO).

### **Murine model of carrageenan-induced thrombosis**

10-week-old BALB/c mice were supplemented with regular water (n = 5) or 2%  $\alpha$ -KG (n = 5) for 10 days. Carrageenan-induced thrombosis model was induced as previously described (2). Mice were injected with 100  $\mu$ l of 10 mg/ml k-carrageenan (Sigma Aldrich) prepared in saline in intraperitoneal cavity. After 48 hours of carrageenan treatment, length and percentage of thrombus covered tail were measured and calculated.

### **Bulk RNA-seq analysis**

RNA from mouse bone marrow and human purified CD14<sup>+</sup> monocytes were extracted using RNeasy Mini Kit (Qiagen) with DNase treatment in duplicate. Samples were then indexed, pooled, and sequenced by Illumina NovaSeq 6000. TMM normalization size factors were calculated with EdgeR package (3.36.0) to adjust for samples for differences in library size. The TMM size factors and the matrix of counts were then use for differential expression analysis between conditions and the results were filtered for only those genes with adjusted p-values less than or equal to 0.05. GSEA was performed using software from Broad Institute (<http://software.broadinstitute.org/gsea/index.jsp>) as described previously (3). GSE2006 dataset was downloaded from GEO (<https://www.ncbi.nlm.nih.gov/geo/>).

### **scRNA-seq analysis**

scRNA-Seq data were initially processed by the Cell Ranger pipeline (2.1.0) from 10 X Genomics using the human reference genome (GrCH38). The generated count matrices were then analyzed with the Seurat (4.3.0) package in R (4.1.3). Read counts were normalized to library size, scaled

by 10,000, log transformed, and filtered based on the following criteria: cells with less than 700 genes detected, proportion of the UMIs mapped to mitochondrial genes over 0.2 were excluded from analysis; Cell-cell variation in gene expression driven by the number of detected molecules and mitochondrial gene expression were regressed out using linear regression. Dimensionality reduction, PCA, UMAP projection, and graph-based clustering analysis were then performed. Marker genes for each cluster were identified with Wilcoxon rank sum test. Canonical markers were used to assign cell type identity to clusters (*GZMB* & *NKG7* for NK cells; *PPBP* & *PF4* for platelets; *CD79A* for B cells; *CD14* & *LYZ* for monocytes; *IL7R*, *S100A4* & *CCR7* for CD4+ T cells; *CD8A* for CD8+ T cells; *CD34* for HSCs). Seurat's `AddModuleScore` function was used to calculate module scores for feature expression programs in single cells. Gene sets for cell scoring were downloaded from MSIGDB ([www.gsea-msigdb.org](http://www.gsea-msigdb.org)) (4, 5); lists of characteristic marker genes include platelet activation, signaling and aggregation (M1077), genes up-regulated in response to IFNG (M5913) and genes defining inflammatory response (M5932). Gene set enrichment analyses were run using GSEA software (4.2.3). GO and KEGG enrichment analyses were performed using clusterProfiler package (4.2.2) with differentially expressed genes (6, 7). DoRothEA, a curated collection of transcription factors (TFs) and its transcriptional targets, and the statistical method VIPER were used to compute TF activities based on the mRNA expression levels of its targets (8, 9). Cells in scRNA-seq were re-clustered using TF activity computed with VIPER and DoRothEA. Top variable TFs in each type of cells were visualized for comparison.

## **Metabolomics**

Metabolites were extracted from frozen platelet pellets at  $4 \times 10^8$ /mL by vigorous vortexing in the presence of ice cold 5:3:2 MeOH:MeCN:water (v/v/v) for 30 min at 4°C. Plasma samples were thawed on ice then a 20 µL aliquot was treated with 480 µL of the aforementioned solution then vortexed for 30 min at 4°C. Supernatants were clarified by centrifugation (10 min, 12,000 g, 4°C). The resulting extracts were analyzed (10 µL per injection for platelets, 20 µL per injection for

plasma) by ultra-high-pressure liquid chromatography coupled to mass spectrometry (UHPLC-MS - Vanquish and Q Exactive, Thermo). Metabolites were resolved on a Kinetex C18 column (2.1 x 150 mm, 1.7  $\mu$ m) using a 5-minute gradient method exactly as previously described (10). Following data acquisition, .raw files were converted to .mzXML using RawConverter then metabolites assigned and peaks integrated using Maven (Princeton University) in conjunction with the KEGG database and an in-house standard library. Quality control was assessed as using technical replicates run at beginning, end, and middle of each sequence as previously described. Data were adjusted by protein quantity from proteomics. For data analysis, the peak intensities were normalized by median, log transformed and Pareto scaled on MetaboAnalyst website ([www.metaboanalyst.ca](http://www.metaboanalyst.ca)). Processed data were analyzed with R using limma (3.50.1) package.

## **Proteomics**

The samples were processed using the S-Trap filter (Protifi) according to the manufacturer's procedure. Briefly, a pellet after metabolomics extraction was solubilized in 50  $\mu$ L of 5% SDS. Samples were reduced with 10 mM DTT at 55°C for 30 min, cooled to room temperature, and then alkylated with 25 mM iodoacetamide in the dark for 30 min. Next, a final concentration of 1.2% phosphoric acid and then six volumes of binding buffer (90% methanol; 100 mM triethylammonium bicarbonate, TEAB; pH 7.1) were added to each sample. After gentle mixing, the protein solution was loaded to a S-Trap filter, spun at 1,000 x g for 1 min, and the flow-through collected and reloaded onto the filter. This step was repeated three times, and then the filter was washed with 200  $\mu$ L of binding buffer 3 times. Finally, 1  $\mu$ g of sequencing-grade trypsin (Promega) and 150  $\mu$ L of digestion buffer (50 mM TEAB) were added onto the filter and digested carried out at 37°C for 6 h. To elute peptides, three stepwise buffers were applied, with 100  $\mu$ L of each with one more repeat, including 50 mM TEAB, 0.2% formic acid in H<sub>2</sub>O, and 50% acetonitrile and 0.2% formic acid in H<sub>2</sub>O. The peptide solutions were pooled, lyophilized and resuspended in 100  $\mu$ L of 0.1% FA.

A 20  $\mu$ L of each sample was loaded onto individual Evotips for desalting and then washed with 20  $\mu$ L 0.1% FA followed by the addition of 100  $\mu$ L storage solvent (0.1% FA) to keep the Evotips wet until analysis. The Evosep One system (Evosep) was used to separate peptides on a Pepsep column, (150  $\mu$ m inner diameter, 15 cm) packed with ReproSil C18 1.9  $\mu$ m, 120A resin. The system was coupled to the timsTOF Pro mass spectrometer (Bruker Daltonics) via the nano-electrospray ion source (Captive Spray, Bruker Daltonics).

The mass spectrometer was operated in PASEF mode. The ramp time was set to 100 ms and 10 PASEF MS/MS scans per topN acquisition cycle were acquired. MS and MS/MS spectra were recorded from  $m/z$  100 to 1700. The ion mobility was scanned from 0.7 to 1.50 Vs/cm<sup>2</sup>. Precursors for data-dependent acquisition were isolated within  $\pm 1$  Th and fragmented with an ion mobility-dependent collision energy, which was linearly increased from 20 to 59 eV in positive mode. Low-abundance precursor ions with an intensity above a threshold of 500 counts but below a target value of 20000 counts were repeatedly scheduled and otherwise dynamically excluded for 0.4 min.

MS/MS spectra were extracted from raw data files and converted into .mgf files using MS Convert (ProteoWizard, Ver. 3.0). Peptide spectral matching was performed with Mascot (Ver. 2.6) against the Uniprot human database. Mass tolerances were  $\pm 15$  ppm for parent ions, and  $\pm 0.4$  Da for fragment ions. Trypsin specificity was used, allowing for 1 missed cleavage. Met oxidation, protein N-terminal acetylation and peptide N-terminal pyroglutamic acid formation were set as variable modifications with Cys carbamidomethylation set as a fixed modification.

Scaffold (version 5.0, Proteome Software) was used to validate MS/MS based peptide and protein identifications. Peptide identifications were accepted if they could be established at greater than 95.0% probability as specified by the Peptide Prophet algorithm. Protein identifications were accepted if they could be established at greater than 99.0% probability and contained at least two identified unique peptides. Data were analyzed with R using DEP package (1.16.0). Normalized data were input for gene set enrichment analysis.

### **Mass cytometry (CyTOF)**

Whole blood was drawn into 4.5 mL tubes containing sodium heparin in accordance with an Institutional Review Board-approved protocol at Washington University in St. Louis. 200  $\mu$ l whole blood were incubated with 200  $\mu$ M Octyl- $\alpha$ -KG or DMSO for 1 hour followed by the stimulation of 10 ng/ml TNF $\alpha$  for 5 min. Add 1 x Proteomic Stabilizer from Smart Tube Inc (1.4ml of Stabilizer per ml of blood), mix gently and incubate for 10 minutes at room temperature. Keep samples at -80°C until it is ready to be stained. Frozen samples were thawed in cold water bath (10°C to 15°C) with agitation of the water for approximately 20 minutes until the samples are fully thawed. Samples were washed with Thaw-Lyse Buffer to lyse erythrocytes accordingly. Cells were then permeabilized, barcoded, stained with surface marker antibodies, permeabilized with methanol, stained with intracellular antibodies, and resuspended in DNA IR-intercalator. CyTOF experiments were conducted on a CyTOF2 mass cytometry (Fluidigm) with validated antibody panels. Post CyTOF run, cell identities were debarcoded and data was analyzed in Cytobank (cytobank.org). Monocytes were gated as follows: CD45+, CD66b-, CD14+. Raw median signal intensities were used for analysis.

## References

1. Jones WL, Ramos CR, Banerjee A, Moore EE, Hansen KC, Coleman JR, et al. Apolipoprotein A-I, elevated in trauma patients, inhibits platelet activation and decreases clot strength. *Platelets*. 2022;33(8):1119-31.
2. Shrimali NM, Agarwal S, Kaur S, Bhattacharya S, Bhattacharyya S, Prchal JT, et al. alpha-Ketoglutarate Inhibits Thrombosis and Inflammation by Prolyl Hydroxylase-2 Mediated Inactivation of Phospho-Akt. *EBioMedicine*. 2021;73:103672.
3. Fisher DAC, Miner CA, Engle EK, Hu H, Collins TB, Zhou A, et al. Cytokine production in myelofibrosis exhibits differential responsiveness to JAK-STAT, MAP kinase, and NFkappaB signaling. *Leukemia*. 2019;33(8):1978-95.
4. Subramanian A, Tamayo P, Mootha VK, Mukherjee S, Ebert BL, Gillette MA, et al. Gene set enrichment analysis: a knowledge-based approach for interpreting genome-wide expression profiles. *Proc Natl Acad Sci U S A*. 2005;102(43):15545-50.
5. Liberzon A, Birger C, Thorvaldsdottir H, Ghandi M, Mesirov JP, and Tamayo P. The Molecular Signatures Database (MSigDB) hallmark gene set collection. *Cell Syst*. 2015;1(6):417-25.
6. Yu G, Wang LG, Han Y, and He QY. clusterProfiler: an R package for comparing biological themes among gene clusters. *OMICS*. 2012;16(5):284-7.
7. Wu T, Hu E, Xu S, Chen M, Guo P, Dai Z, et al. clusterProfiler 4.0: A universal enrichment tool for interpreting omics data. *Innovation (Camb)*. 2021;2(3):100141.
8. Garcia-Alonso L, Holland CH, Ibrahim MM, Turei D, and Saez-Rodriguez J. Benchmark and integration of resources for the estimation of human transcription factor activities. *Genome Res*. 2019;29(8):1363-75.
9. Holland CH, Tanevski J, Perales-Paton J, Gleixner J, Kumar MP, Mereu E, et al. Robustness and applicability of transcription factor and pathway analysis tools on single-cell RNA-seq data. *Genome Biol*. 2020;21(1):36.
10. Nemkov T, Reisz JA, Gehrke S, Hansen KC, and D'Alessandro A. High-Throughput Metabolomics: Isocratic and Gradient Mass Spectrometry-Based Methods. *Methods Mol Biol*. 2019;1978:13-26.
